# Supplementary material for: Tie2-dependent VHL knockdown promotes airway microvascular regeneration and attenuates invasive growth of Aspergillus fumigatus
Source: PubMed Central journal article supplement — J Mol Med (Berl). 2013 Jun 25;91(9):1081–93. doi: 10.1007/s00109-013-1063-8 (PMC3761091; doi:10.1007/s00109-013-1063-8), 2013-06-25
Supplement: 109_2013_1063_MOESM1_ESM.pdf [file 109_2013_1063_MOESM1_ESM.pdf]

**Tie2-dependent VHL knockdown promotes airway  
microvascular regeneration and attenuates invasive growth of  
*Aspergillus fumigatus***

Xinguo Jiang<sup>1,2,3</sup>, Joe L. Hsu<sup>1,2,3</sup>, Wen Tian<sup>2,3</sup>, Ke Yuan<sup>3</sup>, Mark  
Olcholski<sup>3</sup>, Vinicio de Jesus Perez<sup>3</sup>, Gregg L. Semenza<sup>4</sup>, Mark R.  
Nicolls<sup>2,3</sup>

**J Mol Med 2013**

Supplementary Fig. 1

Tie2Cre(-)VHL(fl/+)

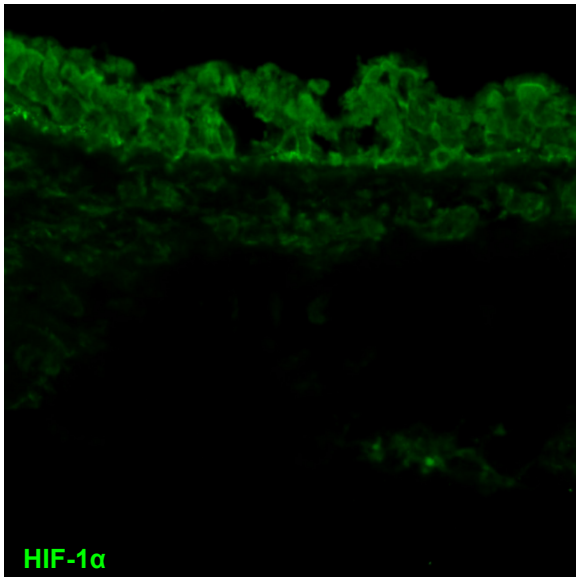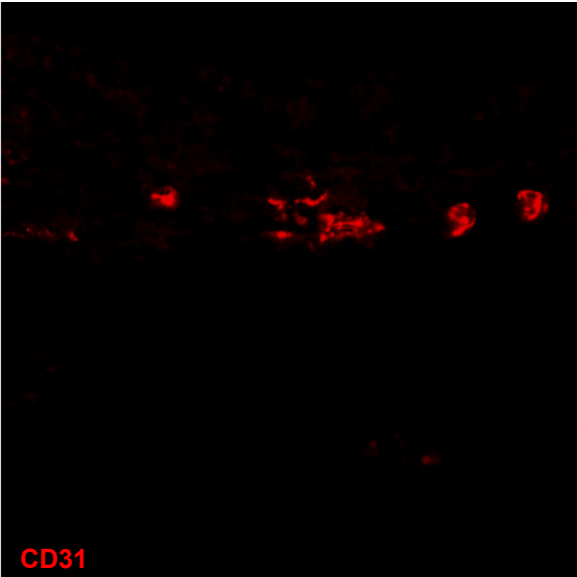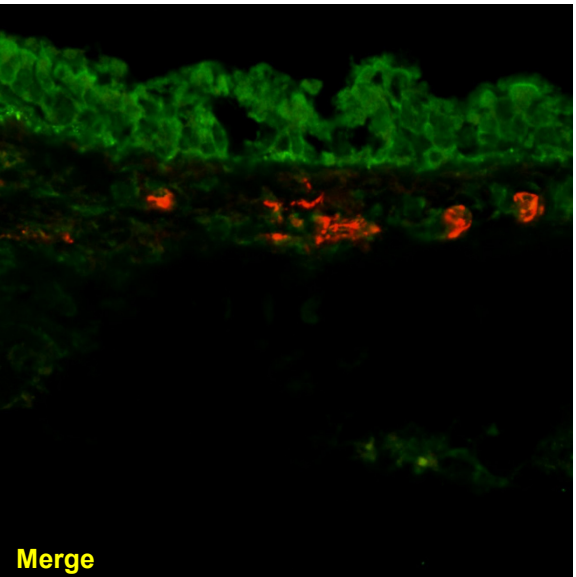

Subepithelium

Tie2Cre(+)VHL(fl/+)

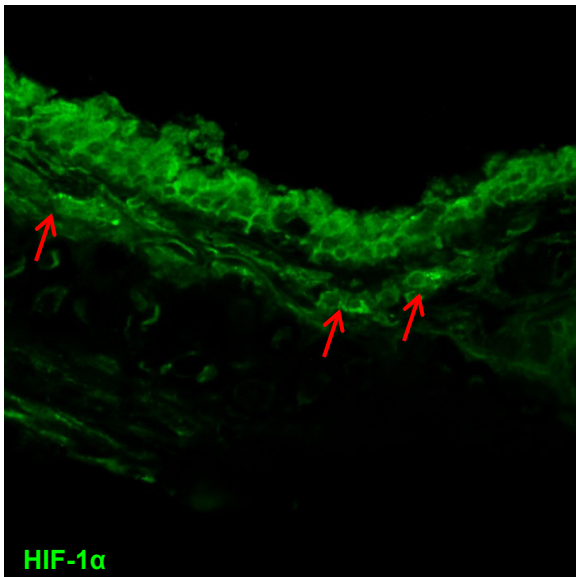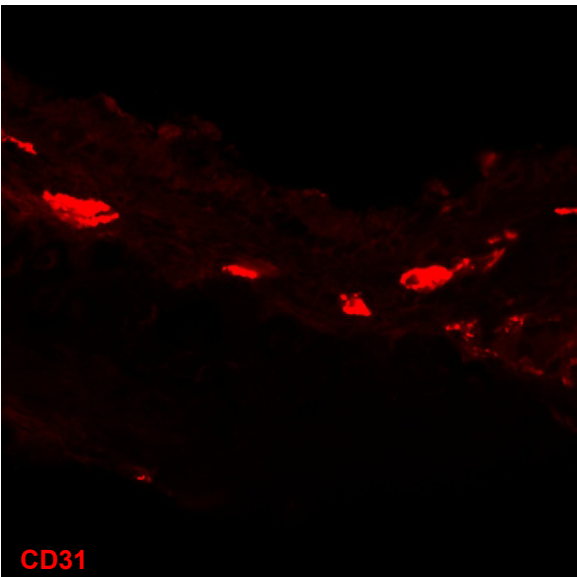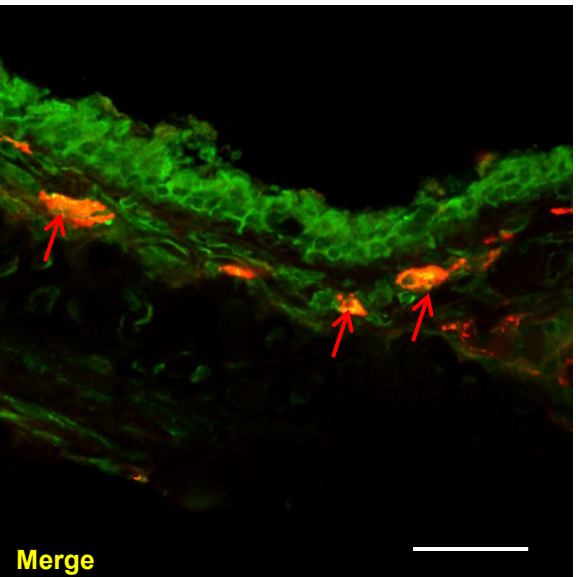

Subepithelium

**Supplementary Fig. 1** Increased HIF-1 $\alpha$  expression in ECs of VHL-haplodeficient trachea. Immunofluorescence staining shows HIF1 $\alpha$  protein expression in ECs from VHL-haplodeficient mice. Red arrows denote HIF-1 $\alpha$ -positive cells. Scale Bar: 20 $\mu$ M.

Supplementary Fig. 2

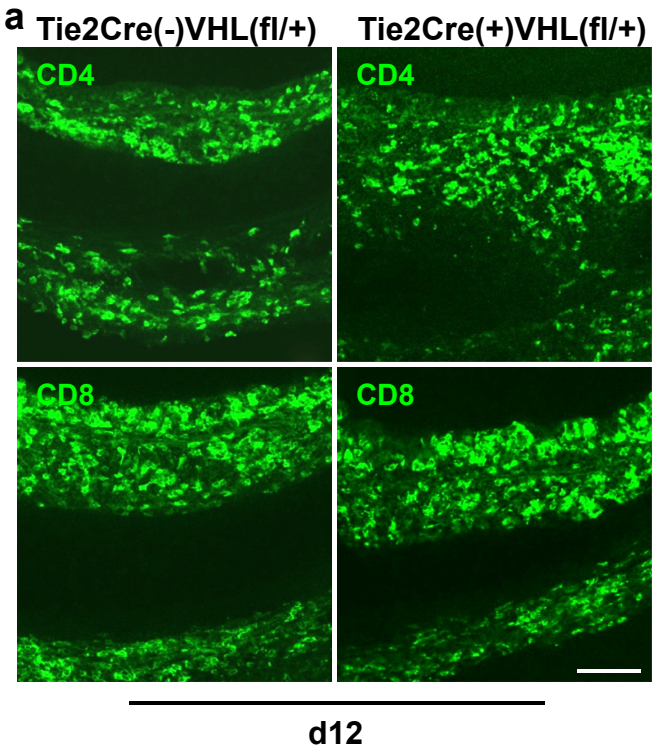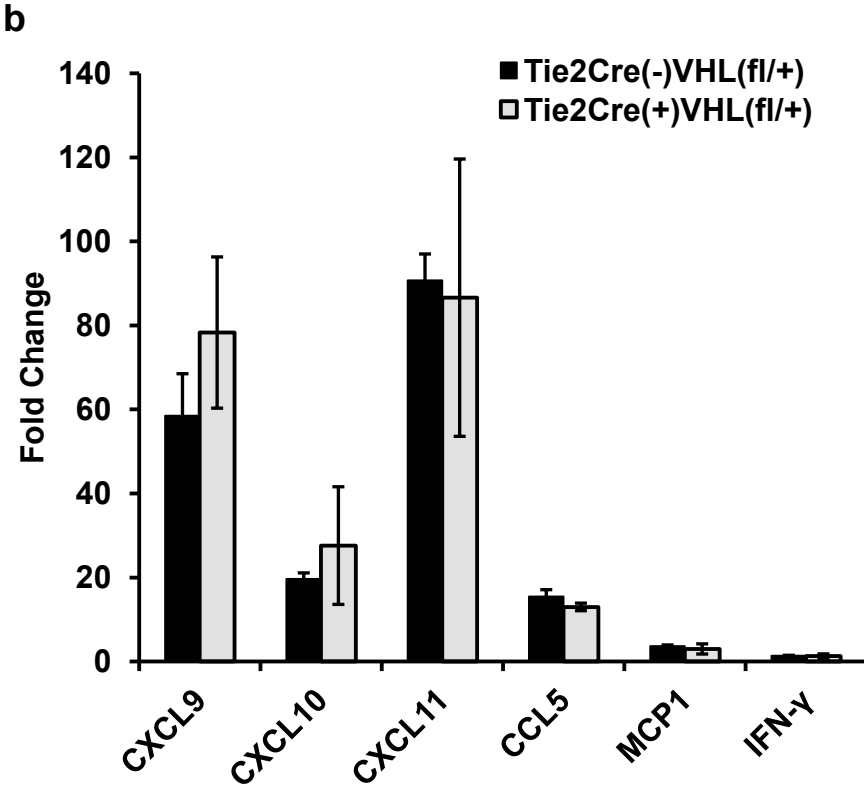

**Supplementary Fig. 2** Comparable infiltration of immune cells and expression of common inflammatory cytokines in tracheas transplanted into both control and VHL haplodeficiency recipients. **a** CD4 and CD8 staining are similar in tracheas transplanted into both control and VHL-haplodeficient recipients at day 12. **b** mRNA expression levels of common inflammatory cytokines are similar in both control and VHL-haplodeficient groups at day 12. Scale bar: 20 $\mu$ M. **(a)**. Data are shown as means  $\pm$  SEM.

# Supplementary Fig. 3

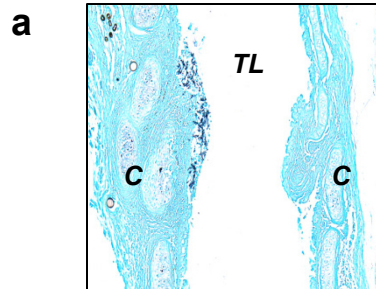

1: minimal, <25%

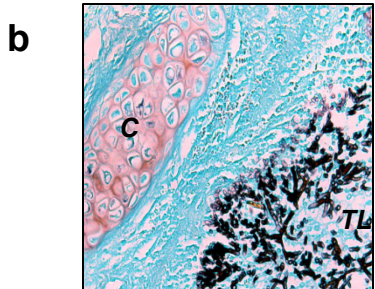

1: minimal, epithelium

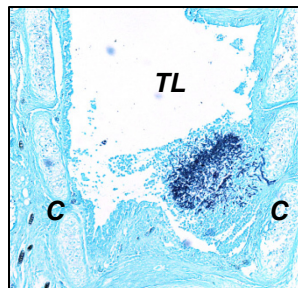

2: mild, 25%-49%

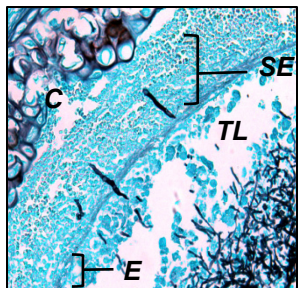

2: mild, subepithelium

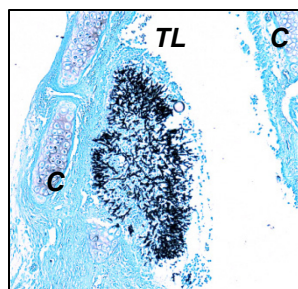

3: moderate, 50-74%

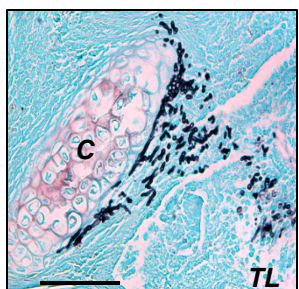

3: moderate, cartilage ring

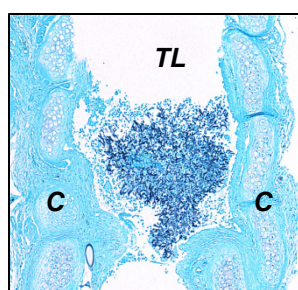

4: severe, >75%

**Supplementary Fig. 3 Semiquantitative scale histopathological definitions.** a Degree of fungal infection was determined using a semiquantitative scoring system as follows: 0, no fungal elements, 1 (minimal), fungal hyphae in less than 25% of the luminal area, 2 (mild) hyphae. Scale Bar: 20 $\mu$ M.

**Supplementary Table 1. Sequences of primers for qRT-PCR analysis**

| <b>Gene</b>                     | <b>Forward Primer</b>   | <b>Reverse Primer</b>     |
|---------------------------------|-------------------------|---------------------------|
| <b>CXCL9</b>                    | CACCAGCCGAGGCACGATCC    | TGCAATTGGGGCTTGGGGCA      |
| <b>CXCL10</b>                   | TCTCGCAAGGACGGTCCGCT    | CGTGGGCAGGATAGGCTCGC      |
| <b>CXCL11</b>                   | GCCATAGCCCTGGCTGCGAT    | CATCCCGGGGCCGATGCAAA      |
| <b>CCL5</b>                     | CATCCTCACTGCAGCCGCCC    | AGCGCGAGGGAGAGGTAGGC      |
| <b>MCP-1</b>                    | GAAGGCCAGCCCAGCACCCAG   | GTGGATGCTCCAGCCGGCAA      |
| <b>IFN-<math>\gamma</math></b>  | CACAGGTCCAGCGCCAAGCA    | CCCACCCCGAATCAGCAGCG      |
| <b>HIF-1<math>\alpha</math></b> | GCTCATCAGTTGCCACTTCCCC  | CGGCATCCAGAAGTTTTCTCACACG |
| <b>SDF-1</b>                    | GAGAGCCACATCGCCAGAG     | TTTCGGGTCAATGCACACTTG     |
| <b>ANGPT1</b>                   | CTACCAACAACAACAGCATCC   | CTCCCTTTAGCAAAACACCTTC    |
| <b>ANGPT2</b>                   | CTGTGCGGAAATCTTCAAGTC   | TGCCATCTTCTCGGTGTT        |
| <b>VEGF</b>                     | GGCTGCTGTAACGATGAAG     | CTCTCTATGTGCTGGCTTTG      |
| <b>PLGF</b>                     | GGATGTGCTCTGTGAATGC     | CCTCTGAGTGGCTGGTTAC       |
| <b>Tie2</b>                     | GTGTAGTGGACCAGAAGG      | CTTGAGAGCAGAGGCATC        |
| <b>VEGFR2</b>                   | GCGGGCTCCTGACTACAC      | CCAAATGCTCCACCAACTCTG     |
| <b>CXCR4</b>                    | AGCATGACGGACAAGTACC     | GATGATATGGACAGCCTTACAC    |
| <b>18S</b>                      | GAATCGAACCCTGATTCCCCGTC | CGGCGACGACCCATTCTGAAC     |
